# Supplementary material
Source: HighWire-hosted journal article supplement (https://ijssurgery.com/content/16/4/674)
Supplement: inline-supplementary-material-1 [file inline-supplementary-material-1.xlsx]

## Sheet: Supplementary material I
ID	Age	Sex	Weight (kg)	Height (m)	Smoker (Y)	BMI	Charlson Comorbidity Index	Indication for surgery	Spinal levels	Pre-op neutrophils	Pre-op lymphocyte	Pre-op Neutrophil-Lymphocyte ratio	Back pain score preop	Leg pain score preop	Preop ODI	Back pain score at 12 months postop	Leg pain score at 12 months postop	ODI score at 12 months postop	Change in back pain score at 12 months	Change in leg pain score at 12 months	Change in ODI score at 12 months	Clinically important improvement in back pain at twelve months (>= 33% improvement)	Clinically important improvement in leg pain at twelve months (>= 40% improvement)	Clinically important improvement in ODI at twelve months (>= 30% improvement)
1	66	F	77	#NULL!	N	#NULL!	2	Spondylolisthesis	1	2.4	1.5	1.6	9	9	78	2.5	0	32	72.2222	100	58.9744	Yes	Yes	Yes
2	51	F	42.2	1.53	N	18.0273	1	Spondylolisthesis	2	3.5	2.7	1.2963	9	10	64	3.5	0	46	61.1111	100	28.125	Yes	Yes	No
3	18	M	74	#NULL!	Y	#NULL!	0	Spondylolisthesis	1	2.5	3.7	0.675676	9	8	62	2	2	6	77.7778	75	90.3226	Yes	Yes	Yes
4	68	F	#NULL!	#NULL!	N	#NULL!	2	Spondylolisthesis	1	3.8	2.2	1.72727	10	10	36	4	2	28	60	80	22.2222	Yes	Yes	No
5	67	M	79.8	1.68	N	28.2738	2	Spondylolisthesis	2	6.8	2	3.4	6	5	48	2	3	8	66.6667	40	83.3333	Yes	Yes	Yes
6	64	F	58	1.56	N	23.833	2	Spondylolisthesis	1	2.1	1.2	1.75	8	8	33	2	0	16	75	100	51.5152	Yes	Yes	Yes
7	59	M	76	1.69	N	26.6097	1	Spondylolisthesis	1	2.2	2.5	0.88	8	2	68	0	0	12	100	100	82.3529	Yes	Yes	Yes
8	58	F	89	1.63	N	33.4977	1	Spondylolisthesis	1	3.6	1.5	2.4	8	5	34	5	0	6	37.5	100	82.3529	Yes	Yes	Yes
9	66	F	90	1.64	N	33.4622	2	Spondylolisthesis	2	3.7	2.2	1.68182	10	6	38	6	0	28	40	100	26.3158	Yes	Yes	No
10	75	F	70.3	1.66	Y	25.5117	3	Lumbar disc herniation	2	7.1	2.6	2.73077	10	10	76	5	2	38	50	80	50	Yes	Yes	Yes
11	43	M	71	1.62	Y	27.0538	0	Spondylolisthesis	1	4.1	2	2.05	9	9	62	9	10	56	0	-11.1111	9.67742	No	No	No
12	67	F	61.4	1.505	N	27.1079	2	Spondylolisthesis	2	2.6	3.3	0.787879	8	6	44	1	1	14	87.5	83.3333	68.1818	Yes	Yes	Yes
13	68	F	93	1.63	N	35.0032	3	Spondylolisthesis	1	5.2	2.3	2.26087	5	7	56	4	3	24	20	57.1429	57.1429	No	Yes	Yes
14	52	M	82.4	1.72	N	27.8529	2	Spondylolisthesis	2	4.2	2.1	2	6	7	32	0	0	0	100	100	100	Yes	Yes	Yes
15	64	M	95	1.71	N	32.4886	2	Spondylolisthesis	1	3	1.3	2.30769	10	5	68	6	4	72	40	20	-5.88235	Yes	No	No
16	58	F	85	1.62	N	32.3884	1	Spondylolisthesis	2	3.6	1.9	1.89474	6	6	34	1	0	14	83.3333	100	58.8235	Yes	Yes	Yes
17	72	F	50	1.52	N	21.6413	3	Spondylolisthesis	2	3.6	1.3	2.76923	8	5	48	4	0	34	50	100	29.1667	Yes	Yes	No
18	43	M	68	1.8	N	20.9877	0	Spondylolisthesis	1	6.1	3.1	1.96774	10	9	64	0	0	0	100	100	100	Yes	Yes	Yes
19	39	M	119.5	1.92	N	32.4164	0	Spondylolisthesis	2	1.8	2.4	0.75	9	3	72	9	1	88	0	66.6667	-22.2222	No	Yes	No
20	58	F	95.5	1.61	N	36.8427	1	Spondylolisthesis	2	7.3	2.4	3.04167	10	10	72	6	0	50	40	100	30.5556	Yes	Yes	Yes
21	72	M	91	1.66	N	33.0237	4	Spondylolisthesis	1	6.3	2.1	3	8	10	58	1	0	1	87.5	100	98.2759	Yes	Yes	Yes
22	49	F	91.9	1.64	N	34.1686	1	Spondylolisthesis	2	3.5	1.5	2.33333	9	9	76	1	1	20	88.8889	88.8889	73.6842	Yes	Yes	Yes
23	52	F	88	1.77	N	28.089	1	Spondylolisthesis	1	4.5	1.7	2.64706	8	8	40	5	0	18	37.5	100	55	Yes	Yes	Yes
24	77	F	61	1.47	N	28.229	3	Lumbar stenosis	2	5.8	2.1	2.7619	8	7	32	2	0	20	75	100	37.5	Yes	Yes	Yes
25	50	F	#NULL!	#NULL!	N	#NULL!	1	Spondylolisthesis	2	3	1.7	1.76471	10	9	66	9	10	66	10	-11.1111	0	No	No	No
26	47	M	78.6	1.72	N	26.5684	0	Spondylolisthesis	2	6.5	3.7	1.75676	2	2	30	7	6	32	-250	-200	-6.66667	No	No	No
27	60	F	67.6	1.63	N	25.4432	2	Spondylolisthesis	2	2.5	2.6	0.961538	5	6	58	2	1	30	60	83.3333	48.2759	Yes	Yes	Yes
28	49	M	94.2	1.77	N	30.068	0	Spondylolisthesis	2	4.2	1.4	3	9	8	62	0	0	0	100	100	100	Yes	Yes	Yes
29	42	F	#NULL!	#NULL!	N	#NULL!	0	Spondylolisthesis	2	4.3	1.6	2.6875	9	4	34	2	0	8	77.7778	100	76.4706	Yes	Yes	Yes
30	51	F	79.4	1.71	N	27.1537	1	Spondylolisthesis	2	14.3	1.1	13	8	8	32	5	2	14	37.5	75	56.25	Yes	Yes	Yes
31	59	F	70.1	1.53	N	29.9457	1	Spondylolisthesis	2	4.6	2.3	2	6	0	42	5	0	16	16.6667	#NULL!	61.9048	No	#NULL!	Yes
32	48	F	102	1.68	N	36.1395	0	Spondylolisthesis	2	5.3	1.9	2.78947	6	9.5	40	1	1	16	83.3333	89.4737	60	Yes	Yes	Yes
33	49	M	83	1.77	N	26.493	0	Spondylolisthesis	2	4.3	2.7	1.59259	7	7	30	3	1	14	57.1429	85.7143	53.3333	Yes	Yes	Yes
34	63	M	109	1.88	N	30.8397	2	Spondylolisthesis	2	2.3	1.7	1.35294	8	9	62	5	8	50	37.5	11.1111	19.3548	Yes	No	No
35	73	F	77.5	1.58	N	31.0447	3	Spondylolisthesis	2	5.3	3.5	1.51429	#NULL!	#NULL!	49	8	0	40	#NULL!	#NULL!	18.3673	#NULL!	#NULL!	No
36	69	M	93.8	1.73	N	31.3408	3	Spondylolisthesis	1	2.9	2.2	1.31818	10	9	38	#NULL!	#NULL!	14	#NULL!	#NULL!	63.1579	#NULL!	#NULL!	Yes
37	46	M	79.8	1.8	Y	24.6296	0	Spondylolisthesis	2	3.5	2.2	1.59091	8	8	22	2	0	2	75	100	90.9091	Yes	Yes	Yes
38	42	F	60	1.6	N	23.4375	0	Degenerative disc disease	1	4.7	2.4	1.95833	7	7	46	7	0	42	0	100	8.69565	No	Yes	No
39	70	M	100.6	1.73	Y	33.6129	4	Lumbar stenosis	2	4.1	3	1.36667	#NULL!	#NULL!	72	8	0	35	#NULL!	#NULL!	51.3889	#NULL!	#NULL!	Yes
40	52	F	103.8	1.66	N	37.6687	1	Spondylolisthesis	1	3.8	1.9	2	7	5	46	3	2	14	57.1429	60	69.5652	Yes	Yes	Yes
41	66	F	72	1.58	N	28.8415	3	Spondylolisthesis	1	5.5	2.7	2.03704	10	10	64	2	0	0	80	100	100	Yes	Yes	Yes
42	36	F	59.6	1.64	N	22.1594	0	Spondylolisthesis	1	1.9	2.4	0.791667	7	3	44	3.5	0	62	50	100	-40.9091	Yes	Yes	No
43	39	M	102	1.77	N	32.5577	0	Lumbar stenosis	2	3	2.9	1.03448	9	8	66	6	6	40	33.3333	25	39.3939	Yes	No	Yes
44	80	M	92	1.74	N	30.3871	4	Spondylolisthesis	1	4.4	1.9	2.31579	10	10	60	3	1	26	70	90	56.6667	Yes	Yes	Yes
45	52	M	91.1	1.68	N	32.2775	1	Spondylolisthesis	1	3.4	1.9	1.78947	7	8	44	5	4	26	28.5714	50	40.9091	No	Yes	Yes
46	34	M	65	1.68	N	23.03	0	Lumbar disc herniation	1	5.6	2.9	1.93103	4	10	70	9	8	60	-125	20	14.2857	No	No	No
47	36	M	91.8	1.8	Y	28.3333	0	Spondylolisthesis	1	4.1	2.3	1.78261	7	4	42	3	0	16	57.1429	100	61.9048	Yes	Yes	Yes
48	50	M	86.5	1.69	N	30.2861	1	Spondylolisthesis	2	4.8	3.3	1.45455	8	8	78	2.5	3	32	68.75	62.5	58.9744	Yes	Yes	Yes
49	49	F	88.7	1.61	N	34.2194	0	Lumbar stenosis	1	2.9	2.8	1.03571	10	10	78	6	6	36	40	40	53.8462	Yes	Yes	Yes
50	29	F	110	1.71	N	37.6184	0	Spondylolisthesis	1	3.7	1.5	2.46667	9	7	58	2.5	1.5	12	72.2222	78.5714	79.3103	Yes	Yes	Yes
51	47	F	68	1.52	N	29.4321	1	Spondylolisthesis	1	13.2	1.5	8.8	9	7	62	6.5	3	44	27.7778	57.1429	29.0323	No	Yes	No
52	66	F	86.5	1.63	N	32.5567	2	Spondylolisthesis	1	3.3	2.4	1.375	8	8	64	4	2	32	50	75	50	Yes	Yes	Yes
53	60	F	46	1.52	N	19.91	3	Spondylolisthesis	1	3.8	1.8	2.11111	8	9	54	7	1	34	12.5	88.8889	37.037	No	Yes	Yes
